# Supplementary material
Source: Royal Society of Chemistry journal article supplement (doi:10.1039/d6fo00655h)

**Supplementary Table S1. Chronic unpredictable mild stress (CUMS) stressor schedule.**

| No. | Stressor                     | Duration | Stress Type                      |
|-----|------------------------------|----------|----------------------------------|
| (a) | Continuous light stimulation | 24 h     | Disruption of circadian rhythm   |
| (b) | Food and water deprivation   | 24 h     | Nutritional and hydration stress |
| (c) | Damp bedding                 | 24 h     | Environmental discomfort         |
| (d) | Behavioural restraint        | > 6 h    | Physical immobilisation stress   |
| (e) | Cold water immersion (4 °C)  | 3 min    | Acute physical stress            |
| (f) | Empty cage (no bedding)      | 24 h     | Environmental deprivation        |
| (g) | Tail pinching                | 2 min    | Mild pain stimulus               |
| (h) | Inclined cage housing (30°)  | 24 h     | Postural discomfort              |

Stressors were applied randomly over 6 weeks (1–2 stressors per day), with no *consecutive repetition of the same stressor within 3 days to maintain unpredictability.*

**Supplementary Table S2 The effects of aloe-emodin on CUMS-induced depressive behaviour in mice**

| Category    | Behavioural Testing | SPT                        |                | TST                     | FST                     |
|-------------|---------------------|----------------------------|----------------|-------------------------|-------------------------|
|             |                     | Sucrose preference rate(%) |                | immobilization time (s) | immobilization time (s) |
|             |                     | 0day                       | 46days         |                         |                         |
| Control     |                     | 83.91±7.90                 | 88.75±6.60     | 25.65±6.45              | 29.29±6.26              |
| CUMS        |                     | 81.27±4.42                 | 49.94±15.1***  | 85.06±4.74***           | 78.74±4.58***           |
| CUMS + Flu  |                     | 80.75±10.33                | 76.07±21.29### | 37.90±9.89###           | 34.49±8.28###           |
| CUMS + AE-D |                     | 84.92±7.53                 | 67.66±4.12#    | 51.50±11.96###          | 45.05±10.28##           |
| CUMS + AE-G |                     | 83.24±4.50                 | 82.99±6.19###  | 31.44±10.91###          | 34.16±8.02##            |
| p           |                     | 0.683                      | 0.001          | 0.001                   | 0.001                   |

*n* = 6, Statistical significance was determined using one-way ANOVA and Tukey's post hoc test, where \**p* < 0.05, \*\**p* < 0.01, \*\*\**p* < 0.001 compared to the control group; #*p* < 0.05, ##*p* < 0.01, ###*p* < 0.001 compared to the CUMS group.

**Supplementary Table S3 The effect of aloe-emodin on the number of hippocampal neurons in CUMS mice**

| Category    | Number of neurons |
|-------------|-------------------|
| Control     | 305.67 ± 2.08     |
| CUMS        | 275.66 ± 11.67*** |
| CUMS + Flu  | 293.33 ± 5.68##   |
| CUMS + AE-D | 302.00 ± 2.64###  |
| CUMS + AE-G | 309.00 ± 2.00###  |
| p           | 0.001             |

*n* = 3, Statistical significance determined by one-way ANOVA and Tukey's post hoc test, where \**p*<0.05, \*\**p*<0.01 compared to the control group. #*p*<0.05, ##*p*<0.01 compared to the CUMS group.

**Supplementary Table S4 ELISA kits used in this study.**

| Cytokine      | Species | Cat. No.     | Method   | Supplier    | Sample Type                   |
|---------------|---------|--------------|----------|-------------|-------------------------------|
| TNF- $\alpha$ | Mouse   | E-EL-M3063   | Sandwich | Elabscience | Serum,<br>Hippocampus,<br>BV2 |
| IL-6          | Mouse   | E-EL-M0044   | Sandwich | Elabscience | Serum,<br>Hippocampus,<br>BV2 |
| IL-1 $\beta$  | Mouse   | E-EL-M0037   | Sandwich | Elabscience | Serum,<br>Hippocampus         |
| IL-10         | Mouse   | E-HSEL-M0004 | Sandwich | Elabscience | BV2<br>supernatant            |

All kits were purchased from Elabscience Biotechnology Co., Ltd. (Wuhan, China). BV2, BV2 microglial cell line.

**Supplementary Table S5 The effects of aloe-emodin on CUMS-induced pro-inflammatory factors in the serum of mice**

| Category    | IL-6                 | IL-1 $\beta$        | TNF- $\alpha$        |
|-------------|----------------------|---------------------|----------------------|
| Control     | 36.849 $\pm$ 4.946   | 10.40 $\pm$ 4.50    | 13.53 $\pm$ 1.393    |
| CUMS        | 95.54 $\pm$ 13.89*** | 26.02 $\pm$ 6.71*** | 42.71 $\pm$ 7.38***  |
| CUMS + Flu  | 45.00 $\pm$ 5.62###  | 13.76 $\pm$ 3.74### | 16.62 $\pm$ 2.85###  |
| CUMS + AE-D | 65.38 $\pm$ 11.48### | 23.72 $\pm$ 2.71#   | 17.78 $\pm$ 2.83###  |
| CUMS + AE-G | 39.97 $\pm$ 3.71###  | 15.42 $\pm$ 2.68### | 16.041 $\pm$ 4.97### |
| p           | 0.000                | 0.000               | 0.000                |

*n* = 3, Statistical analysis was performed using one-way analysis of variance (ANOVA), where \**p* < 0.05, \*\**p* < 0.01, \*\*\**p* < 0.01 compared with the control group; #*p* < 0.05, ##*p* < 0.01, ###*p* < 0.01 compared with the CUMS group.

**Supplementary Table S6 The effects of aloe-emodin on pro-inflammatory factors in the hippocampus of mice induced by CUMS**

| Category    | IL-6                  | IL-1 $\beta$          | TNF- $\alpha$         |
|-------------|-----------------------|-----------------------|-----------------------|
| Control     | 21.95 $\pm$ 3.80      | 35.70 $\pm$ 5.51      | 114.97 $\pm$ 17.50    |
| CUMS        | 505.80 $\pm$ 14.78*** | 227.64 $\pm$ 6.55***  | 481.52 $\pm$ 22.33*** |
| CUMS + Flu  | 282.77 $\pm$ 7.98###  | 168.12 $\pm$ 13.73### | 278.81 $\pm$ 10.05##  |
| CUMS + AE-D | 302.90 $\pm$ 8.88###  | 109.92 $\pm$ 41.61##  | 286.99 $\pm$ 15.73### |
| CUMS + AE-G | 242.82 $\pm$ 11.10### | 95.52 $\pm$ 13.61###  | 257.85 $\pm$ 8.46###  |
| p           | 0.000                 | 0.000                 | 0.000                 |

*n* = 3, Statistical analysis was performed using one-way analysis of variance (ANOVA), where \**p* < 0.05, \*\**p* < 0.01, \*\*\**p* < 0.01 compared with the control group; #*p* < 0.05, ##*p* < 0.01, ###*p* < 0.01 compared with the CUMS group.

**Supplementary Table S7. Top 15 hub genes in the aloë-emodin–depression PPI network ranked by degree**

| <b>Gene</b>  | <b>Degree</b> | <b>Betweenness<br/>Centrality</b> | <b>Closeness<br/>Centrality</b> | <b>Functional Description</b>                                                                                                                                                                                                                                                          |
|--------------|---------------|-----------------------------------|---------------------------------|----------------------------------------------------------------------------------------------------------------------------------------------------------------------------------------------------------------------------------------------------------------------------------------|
| <i>TNF</i>   | 65            | 0.06241571                        | 0.78378378                      | IL-17 signaling pathway; PI3K/AKT pathway; MAPK signaling pathway; TNF signaling pathway                                                                                                                                                                                               |
| <i>TP53</i>  | 64            | 0.15458516                        | 0.79090909                      | MAPK signaling pathway; ErbB signaling pathway; Relaxin signaling pathway                                                                                                                                                                                                              |
| <i>IL1B</i>  | 60            | 0.04624122                        | 0.75                            | IL-17 signaling pathway; PI3K/AKT pathway; MAPK signaling pathway; TNF signaling pathway                                                                                                                                                                                               |
| <i>AKT1</i>  | 60            | 0.04590488                        | 0.75652174                      | TNF signaling pathway; Estrogen signaling pathway; MAPK signaling pathway; Relaxin signaling pathway; PI3K-Akt signaling pathway; AGE-RAGE signaling pathway in diabetic complications; Prolactin signaling pathway; EGFR tyrosine kinase inhibitor resistance; ErbB signaling pathway |
| <i>BCL2</i>  | 58            | 0.04684285                        | 0.73728814                      | Estrogen signaling pathway; PI3K-Akt signaling pathway; Prolactin signaling pathway; ErbB signaling pathway                                                                                                                                                                            |
| <i>CASP3</i> | 58            | 0.0295499                         | 0.73728814                      | IL-17 signaling pathway; PI3K/AKT pathway; MAPK signaling pathway; TNF signaling pathway                                                                                                                                                                                               |
| <i>EGFR</i>  | 58            | 0.0417475                         | 0.73728814                      | Estrogen signaling pathway; MAPK signaling pathway; Prolactin signaling pathway; EGFR tyrosine kinase inhibitor resistance                                                                                                                                                             |
| <i>MYC</i>   | 57            | 0.07226287                        | 0.73728814                      | MAPK signaling pathway; Relaxin signaling pathway; EGFR tyrosine kinase inhibitor resistance; ErbB signaling pathway                                                                                                                                                                   |

**Supplementary Table S7. Top 15 hub genes in the aloe-emodin–depression PPI network ranked by degree (Continued)**

| <b>Gene</b>   | <b>Degree</b> | <b>Betweenness Centrality</b> | <b>Closeness Centrality</b> | <b>Functional Description</b>                                                                                                                                                                                                                                                                                   |
|---------------|---------------|-------------------------------|-----------------------------|-----------------------------------------------------------------------------------------------------------------------------------------------------------------------------------------------------------------------------------------------------------------------------------------------------------------|
| <i>ESR1</i>   | 50            | 0.01965676                    | 0.68503937                  | Estrogen signaling pathway; Relaxin signaling pathway; AGE-RAGE signaling pathway in diabetic complications                                                                                                                                                                                                     |
| <i>MAPK3</i>  | 49            | 0.01585066                    | 0.6796875                   | IL-17 signaling pathway; TNF signaling pathway; Estrogen signaling pathway; MAPK signaling pathway; Relaxin signaling pathway; PI3K-Akt signaling pathway; AGE-RAGE signaling pathway in diabetic complications; Prolactin signaling pathway; EGFR tyrosine kinase inhibitor resistance; ErbB signaling pathway |
| <i>MMP9</i>   | 47            | 0.02464199                    | 0.66923077                  | IL-17 signaling pathway; TNF signaling pathway; Estrogen signaling pathway                                                                                                                                                                                                                                      |
| <i>GSK3B</i>  | 47            | 0.0254368                     | 0.6744186                   | IL-17 signaling pathway; Relaxin signaling pathway; PI3K-Akt signaling pathway; AGE-RAGE signaling pathway in diabetic complications; Prolactin signaling pathway; ErbB signaling pathway                                                                                                                       |
| <i>PTGS2</i>  | 46            | 0.01648132                    | 0.66923077                  | IL-17 signaling pathway; TNF signaling pathway                                                                                                                                                                                                                                                                  |
| <i>MAPK1</i>  | 43            | 0.01521087                    | 0.64925373                  | IL-17 signaling pathway; TNF signaling pathway; Estrogen signaling pathway; MAPK signaling pathway; Relaxin signaling pathway; PI3K-Akt signaling pathway; AGE-RAGE signaling pathway in diabetic complications; Prolactin signaling pathway; EGFR tyrosine kinase inhibitor resistance; ErbB signaling pathway |
| <i>PIK3CA</i> | 43            | 0.009402                      | 0.6                         | PI3K-Akt signaling pathway                                                                                                                                                                                                                                                                                      |

*Topological parameters were calculated using the Network Analyzer tool in Cytoscape 3.7.1. Degree indicates the number of direct interactions; betweenness centrality measures the extent to which a node lies on shortest paths; closeness centrality reflects proximity to all other nodes.*

**Supplementary Table S8. Molecular docking results for aloe-emodin and key molecular targets**

---

| <b>Sample</b>      | AKT1  | GSK3B | PIK3CA | PTGS2 | MAPK1 | MAPK3 | BCL2  | Casp3 | ESR1  | TNF   | IL1B  | MMP9  | MYC   | TP53 | EGFR  |
|--------------------|-------|-------|--------|-------|-------|-------|-------|-------|-------|-------|-------|-------|-------|------|-------|
| <b>Aloe-emodin</b> | -10.1 | -8.6  | -8.1   | -7.7  | -7.6  | -7.6  | -7.43 | -7.13 | -7.00 | -6.95 | -6.99 | -6.72 | -6.52 | -6.2 | -6.03 |

---

*Using AutoDock Vina software, molecular docking results were obtained for aloe-emodin and 15 key depression targets identified through network pharmacology screening. The lower the binding energy, the more stable the binding conformation; when the binding energy is less than  $-5.0 \text{ kcal}\cdot\text{mol}^{-1}$ , the drug compound can bind tightly to the target.*

**Supplementary Table S9 Primary antibodies used in western blotting (WB) and immunofluorescence (IF).**

| Antibody          | Host   | Cat. No. | Dilution | MW      | Supplier                  | Application |
|-------------------|--------|----------|----------|---------|---------------------------|-------------|
| PI3K              | Rabbit | 4249     | 1:1000   | 110 kDa | Cell Signaling Technology | WB          |
| Phospho-PI3K      | Rabbit | 17366    | 1:1000   | 85 kDa  | Cell Signaling Technology | WB          |
| AKT               | Rabbit | 4691     | 1:1000   | 60 kDa  | Cell Signaling Technology | WB          |
| Phospho-AKT       | Rabbit | 4060     | 1:2000   | 60 kDa  | Cell Signaling Technology | WB          |
| NF-κB p65         | Rabbit | 8242     | 1:1000   | 65 kDa  | Cell Signaling Technology | WB          |
| Phospho-NF-κB p65 | Rabbit | 3033     | 1:1000   | 65 kDa  | Cell Signaling Technology | WB          |
| β-actin           | Mouse  | GV15003  | 1:1000   | 43 kDa  | Solarbio                  | WB          |
| Iba-1             | Rabbit | ab178847 | 1:500    | —       | Abcam                     | IF          |
| CD68              | Rabbit | ab213363 | 1:500    | —       | Abcam                     | IF          |

*MW, molecular weight; WB, western blotting; IF, immunofluorescence; —, not applicable.*

**Supplementary Table S10 Percentage of CD68/Iba-1-positive cells in the hippocampus.**

| Category    |                |
|-------------|----------------|
| Control     | 0.09 ± 0.02    |
| CUMS        | 0.28 ± 0.03*** |
| CUMS + Flu  | 0.18 ± 0.01### |
| CUMS + AE-D | 0.15 ± 0.01### |
| CUMS + AE-G | 0.14 ± 0.01### |
| p           | 0.001          |

*n = 3, Statistical significance determined by one-way ANOVA and Tukey's post hoc test, where \* $p < 0.05$ , \*\* $p < 0.01$ ,*

*\*\*\* $p < 0.001$  compared to control group; # $p < 0.05$ , ## $p < 0.01$ , ### $p < 0.001$  compared to CUMS group.*

**Supplementary Table S11 Screening of effective doses of aloe-emodin on BV2 cells**

| Category    |                 |
|-------------|-----------------|
| Control     | 100.00 ± 0.00   |
| LPS         | 66.79 ± 4.27*** |
| LPS + 0.325 | 90.35 ± 5.87    |
| LPS + 1.250 | 91.47 ± 1.18#   |
| LPS + 2.500 | 95.81 ± 3.57##  |
| LPS + 3.125 | 95.48 ± 3.45### |
| LPS + 5.000 | 98.68 ± 1.40### |
| LPS + 10.00 | 91.51 ± 1.31##  |
| LPS + 12.50 | 71.91 ± 0.80    |

*n* = 3, Statistical significance was determined using one-way analysis of variance (ANOVA) and Tukey's post hoc test, where \**p*<0.05, \*\**p*<0.01, \*\*\**p*<0.001 compared with the control group; #*p*<0.05, ##*p*<0.01, ###*p*<0.001 compared with the LPS group.

**Supplementary Table S12 The effect of aloe-emodin on the levels of TNF- $\alpha$ , IL-6 and IL-10 in the culture supernatant of LPS-induced BV2 microglial cells**

| Category          | IL-6                | TNF- $\alpha$       | IL-10            |
|-------------------|---------------------|---------------------|------------------|
| Control           | 21.70 ± 8.81        | 87.86 ± 13.05       | 18.24 ± 0.72     |
| CUMS              | 5148.89 ± 111.89*** | 6383.24 ± 323.90*** | 64.97 ± 1.19***  |
| CUMS + 1 $\mu$ M  | 2690.36 ± 157.16### | 2396.85 ± 171.53### | 100.94 ± 0.53### |
| CUMS + 5 $\mu$ M  | 2610.79 ± 97.64###  | 2539.56 ± 67.20###  | 107.76 ± 0.33### |
| CUMS + 10 $\mu$ M | 2009.87 ± 69.36###  | 2438.52 ± 78.18###  | 118.83 ± 1.06### |
| <i>p</i>          | 0.000               | 0.000               | 0.000            |

*n* = 3, Statistical significance was determined using one-way analysis of variance (ANOVA) and Tukey's post hoc test, where \**p*<0.05, \*\**p*<0.01, \*\*\**p*<0.001 compared with the control group; #*p*<0.05, ##*p*<0.01, ###*p*<0.001 compared with the LPS group.

Original western blot bands :

Complete Western blot bands of AKT, phosphorylated AKT, PI3K, phosphorylated PI3K, NF- $\kappa$ B P65, phosphorylated NF- $\kappa$ B P65, and  $\beta$ -actin in hippocampal tissues of different groups

Figure\_5A

AKT ; p-AKT

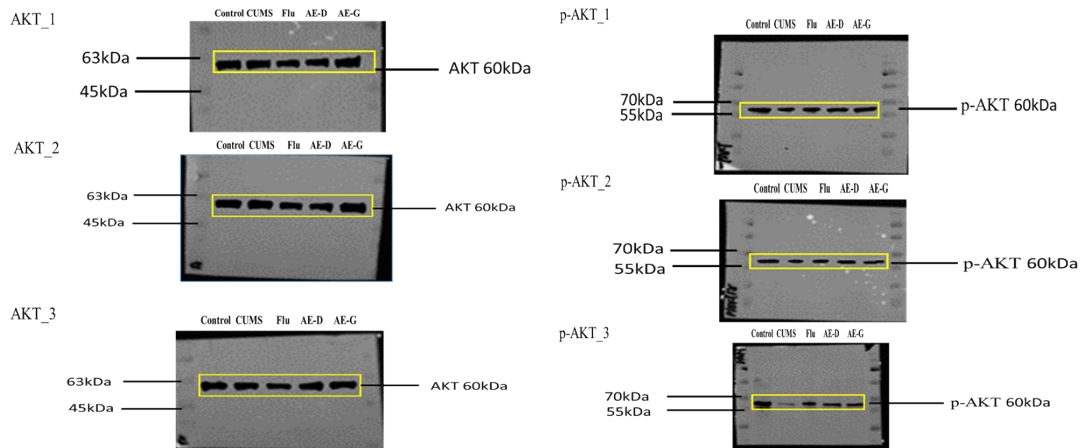

PI3K ; p-PI3K

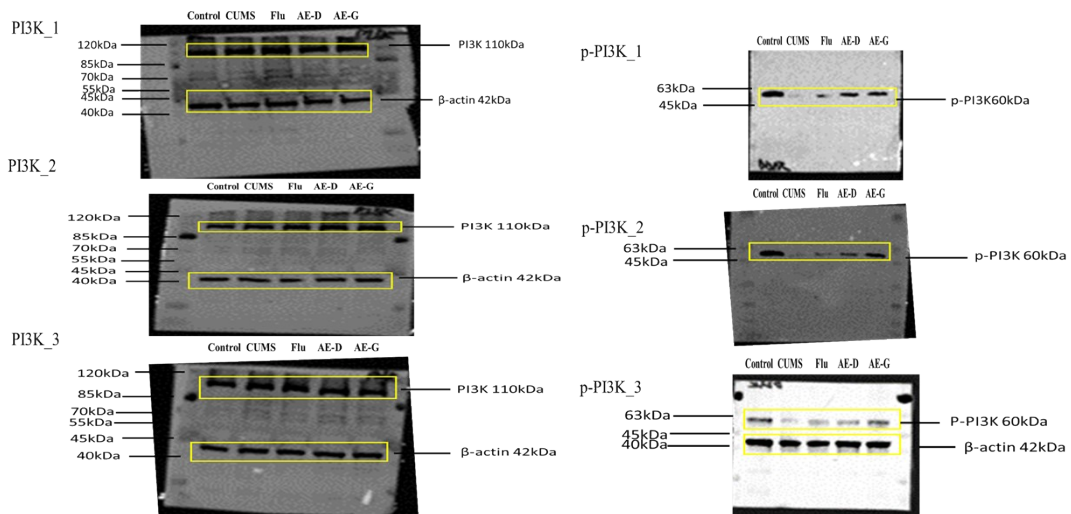

NF- $\kappa$ B P65 ; p-NF- $\kappa$ B P65

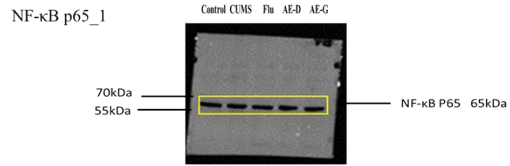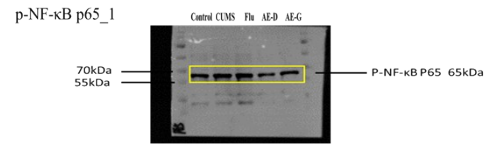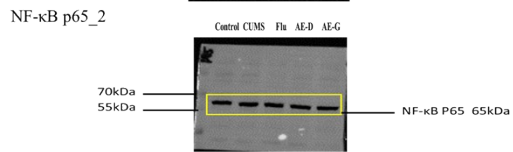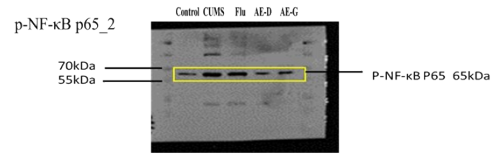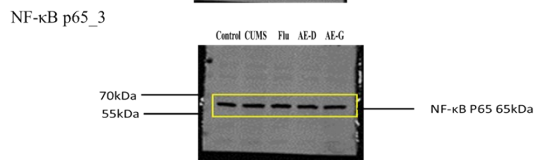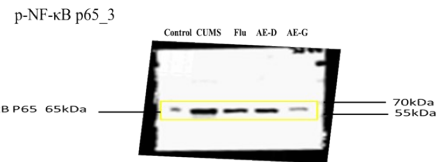

## β-actin

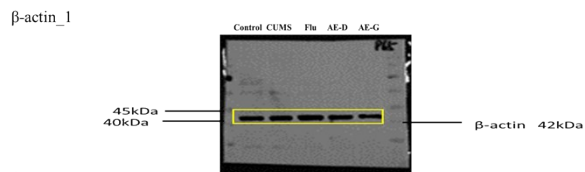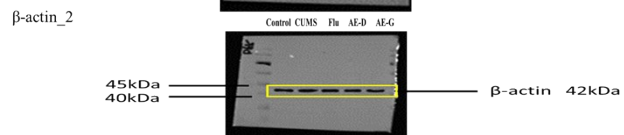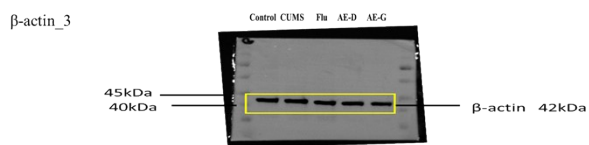

Supplement: d6fo00655h1.pdf [file d6fo00655h1.pdf]
